# Supplementary material for: Evidence of acclimatization or adaptation in Hawaiian corals to higher ocean temperatures
Source: PubMed Central journal article supplement (PMC6086081; doi:10.7717/peerj.5347), 2018-08-07

*Pocillopora damicornis*

*Montipora capitata*

*Lobactis scutaria*

*Porites compressa*

Normal (1)

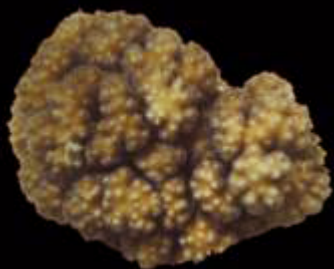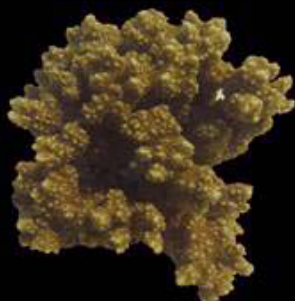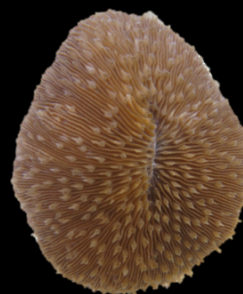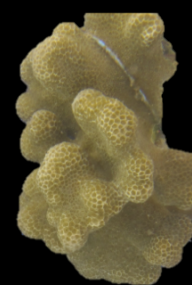

Pale (2)

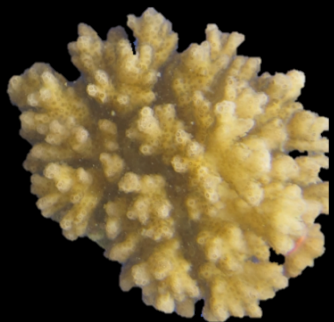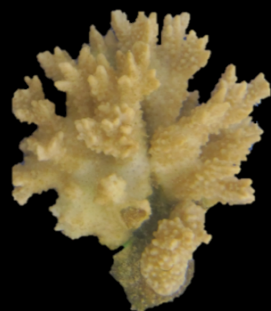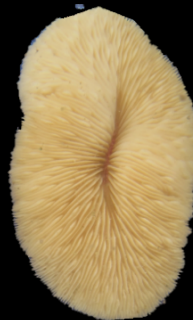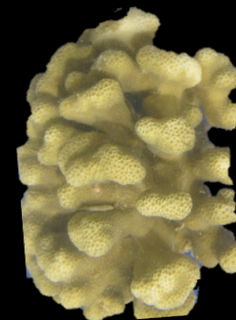

Bleached (3)

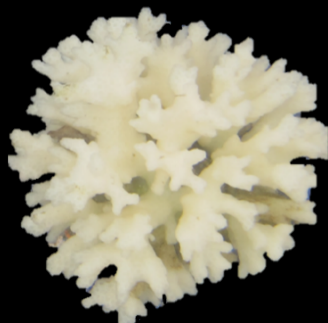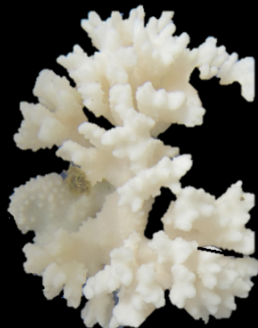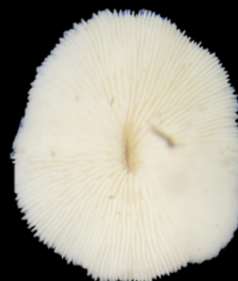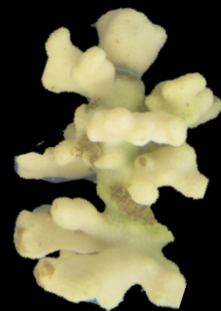

Dead (4)

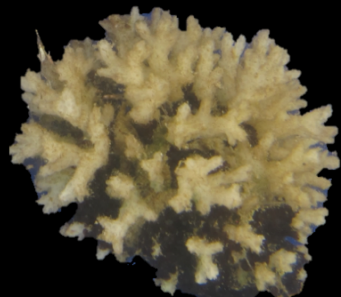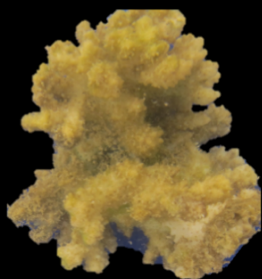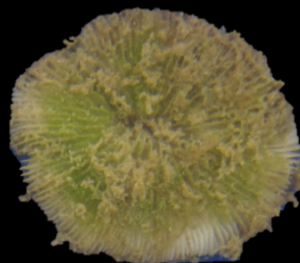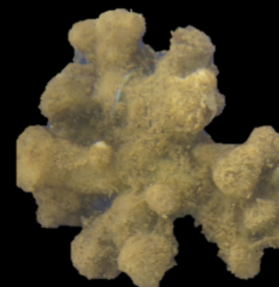

Supplement: peerj-06-5347-s002.pdf [file peerj-06-5347-s002.pdf]
